# Supplementary material for: Literature review of tri-colored bat natural history with implications to management
Source: Frontiers journal article supplement (doi:10.3389/fcosc.2023.1204901), 2023-09-21
Supplement: Table_1.XLSX [file Table_1.XLSX]

## Sheet: SupplementalTable1
Year Published	FIDs	Citation	Season	Months & years of study	Female	Male	PESU Bat Count Total	Site Count	Study County	Study State	Latitude	Longitude	Notes
1921	a1	Allen, A.A., 1921. Banding bats. Journal of Mammalogy 2:53–57					4		Tompkins County	New York			Three of four banded tri-colored bats recovered after 3 years.
1942	a2	Rysgaard, G.N., 1942. A study of the cave bats of Minnesota with especial reference to the large brown bat, Eptesicus fuscus fuscus (Beauvois). The American Midland Naturalist, 28(1), pp.245-267.	Winter	1940, 1941	0	0	100	7	Goodhue County, Fillmore County, Nicollet County, Scott County, Wabasha County, Washington County	Minnesota
1945	a3	Mohr, C.E., 1945, January. Sex ratios of bats in Pennsylvania. In Proceedings of the Pennsylvania Academy of Science (Vol. 19, pp. 65-69). Penn State University (summer) Press.	Summer	June 21 - August 23 1945	22	29	51	1	Berks County	Pennsylvannia
1945	a4	Mohr, C.E., 1945, January. Sex ratios of bats in Pennsylvania. In Proceedings of the Pennsylvania Academy of Science (Vol. 19, pp. 65-69). Penn State University (winter) Press.	Winter	Dec 21 1945 - March 20 1946		16F,50M 43F,166M 43F,85M	16F,50M 43F,166M 43F,85M	3	Franklin County	Pennsylvannia
1945	a5	Wimsatt, William A. "Notes on breeding behavior, pregnancy, and parturition in some vespertilionid bats of the eastern United States." Journal of Mammalogy 26, no. 1 (1945): 23-33.	Summer	May 1943	25	1	26	1	Tompkins County	New York			Bats were taken by being shot at summer feeding grounds. This data suggests sex differences between feeding areas.
1946	a6	Lane, H.K., 1946. Notes on Pipistrellus subflavus subflavus (F. Cuvier) during the season of parturition. In Proceedings of the Pennsylvania Academy of Science (Vol. 20, pp. 57-61). Penn State University Press.	Summer	June 11 1935; June 12-July 18 1945-1936; May 23-30 1945; August 8 1945	30	1	75	1	Lancaster County	Pennsylvania			9 nursing females and 21 non-reproductive adult females captured; nursing females produced 2 young from mid June to early July
1948	a7	Rinker G.C., 1948. A bat (Pipistrellus) record from Honduras. Journal of Mammalogy, 29: 179–180. https:// doi.org/10.1093/jmammal/29.2.179			3		3	1		Honduras			Investigated unidentified specimens in the museum. Three pregnant P. flavus.
1952	a8	Jones, J.K., Loomis, R.B., Krutzsch, P.H. and Webb, O.L., 1952. New Records of Bats from Northeastern Kansas, with Notes on the Bat Chigger, Euschongastia pipistrelli (Acarina, Trombiculidae). Transactions of the Kansas Academy of Science (1903-), 55(3), pp.312-314.	Winter	1951	12	40	52	1	Marshal County	Kansas
1954	a9	Goehring, H.H., 1954. Pipistrellus subflavus obscurus, Myotis keenii, and Eptesicus fuscus fuscus hibernating in a storm sewer in central Minnesota. Journal of Mammalogy, 35(3), pp.434-436.	Winter	1952	4	1	5	1	Stearns County	Minnesota			Hibernating in stormwater sewer between unmortared granite blocks.
1955	a10	Cockrum, E.L., 1955. Reproduction in North American bats. Transactions of the Kansas Academy of Science (1903-), 58(4), pp.487-511.	Winter and Summer	N/A	0	0	0	0	0	0			Review of life history.
1959	a11	Davis, W.H. 1959. Disproportionate Sex Ratios in Hibernating Bats. Journal of Mammalogy , Feb., 1959, Vol. 40, No. 1 (Feb., 1959), pp. 16-19	Winter	Dec 27-28: 1952, 1953, 1954, 1955	118, 88	303, 319	828	1	Monroe County,	West Virginia			2 caves, 5 years. Males have better survival rates than females.
1960	a12	Cope, J.B., Baker, W.I.L.S.O.N. and Confer, J.A.C.K., 1960. Breeding colonies of four species of bats of Indiana. In Proceedings of the Indiana Academy of Science (Vol. 70, pp. 262-266).	Summer	1959	0	0	0	1	Jackson County	Indiana
1960	a13	Muir, T.J. and Polder, E., 1960. Notes on hibernating bats in Dubuque County caves. In Proceedings of the Iowa Academy of Science (Vol. 67, No. 1, pp. 602-606).	Winter	Oct 15 1958 - Jan 9 1959	2	2	4	1	Dubuque County	Iowa			Eptesicus juscus (Beauvais), Myotis lucijugus (Le Conte). M. sodalis (Miller and Allen), and Pipistrellus subflavus (F. Cuvier) found hibernating in same cave. P. subftavus collected at Becker's Quarry Cave averaged as follows: total length, 85.6 mm.; forearm, 32.2 mm.; tail, 39 mm.; hindfoot, 8.1 mm. The average weight of these four specimens was 4.49 grams.
1964	a14	Davis, W.H., 1964. Winter awakening patterns in the bats Myotis lucifugus and Pipistrellus subflavus. Journal of Mammalogy, 45(4), pp.645-647.	Winter	Feb 9 - may 1963	0	0	20	1	Carter County	Kentucky			Bat movement in winter. Tricolored bats rarely moved.
1966	a15	Davis, W.H., 1966. Population dynamics of the bat Pipistrellus subflavus. Journal of Mammalogy, 47(3), pp.383-396.	Winter	1952-1965	1,044 & 1,405	4,383 & 4,303	11062	2	Monroe County, Pendleton County	West Virginia			Very detailed life history and survival rates.
1968	a16	Jones, C. and Pagels, J., 1968. Notes on a population of Pipistrellus subflavus in southern Louisiana. Journal of Mammalogy, 49(1), pp.134-139. (summer)	Summer	1965, 1966	30	36	66	1	Plaquemines Parish	Louisiana
1968	a17	Jones, C. and Pagels, J., 1968. Notes on a population of Pipistrellus subflavus in southern Louisiana. Journal of Mammalogy, 49(1), pp.134-139. (winter)	Winter	1965, 1966	61,14	44,5	124	1	Plaquemines Parish	Louisiana
1968	a18	Kunz, T.H. and Schlitter, D.A., 1968. An annotated checklist of bats from Iowa. Transactions of the Kansas Academy of Science (1903-), 71(2), pp.166-175.	summer	june - july 1965, 1966	0	0	19	15	Black Hawk, Boone County, Buena Vista, Clayton, Clinton, Dallas, Dubuque, Grundy, Hardin, Jackson, Mahaska, Polk,	Iowa			hibernacula reported in cave with other bat species
1970	a19	Blankespoor, H.D. and Ulmer, M.J., 1970. Helminths from six species of Iowa bats. In Proceedings of the Iowa Academy of Science (Vol. 77, No. 1, pp. 200-206).	Summer				4	2	Black Hawk and Hardin County	Iowa			bats collected using mist nets, from caves, and barns but did not specify which species was taken from where
1971	a20	Kunz, T.H., 1971. Reproduction of some vespertilionid bats in central Iowa. American Midland Naturalist, pp.477-486.	Summer	Jun Jul 1967, 1968, 1969	2	0		1	Boone County	Iowa			Mist netting, only two were captured. One lactating, one post lactation
1971	a21	Whitaker Jr, J.O. and Mumford, R.E., 1971. Notes on a collection of bats taken by mist-netting at an Indiana cave. American Midland Naturalist, pp.277-279.	Summer	August 20 1969	0	0	9	1	Lawrence County	Indiana			captured by mistnetting outside hibernacula cave (Donnehue's Cave0
1975	a22	Wheat, B.E., 1975. Eimeria macyi sp. n.(Protozoa: Eimeriidae) from the eastern pipistrelle, Pipistrellus subflavus, from Alabama. The Journal of Parasitology, pp.920-922.	winter	1974			10		Clarke County	Alabama			cave
1979	a23	Czaplewski, N. J., Farney, J. P., Jones Jr., J. K., and Druecker J.D. 1979. Synopsis of Bats of Nebraska. Occassional Papers The Museum Texas Tech University. 61, pp. 1-24.	Winter	1978	0	0	0	2	Cass County, Sarpy County	Nebraska			Only known from limestone quarries hibernacula
1980	a24	Ashley, D.C. and Rabalais, F.C., 1980. Brief Note: Helminth Parasites of Pipistrellus Subflavus from Ohio. The Ohio Journal of Science, 80(2), pp.64-64.	Winter	december 20 1971	5	3	8	1	Adams County	Ohio			Parasites collected
1985	a25	Brack Jr, V. and TwENTE, J.W., 1985. The duration of the period of hibernation of three species of vespertilionid bats. I. Field studies. Canadian journal of Zoology, 63(12), pp.2952-2954.	Winter				155	2	Boone County	Missouri
1985	a26	Griffith, L.A. and Gates, J.E., 1985. Food habits of cave-dwelling bats in the central Appalachians. Journal of Mammalogy, 66(3), pp.451-460.	Summer	June-October 1980	1	43	44	7	Garret, Washington, Alleghany County	Maryland			Diptera most common in stomaches/feces followed by Homoptera and Hymenoptera
1986	a27	Krutzsch, P.H. and Crichton, E.G., 1986. Reproduction of the male eastern pipistrelle, Pipistrellus subflavus, in the north-eastern United States. Reproduction, 76(1), pp.91-104.	Summer	na	0	0	0	0	0	0			Dissection of genetalia
1991	a28	Cope, J.B., Whitaker Jr, J.O. and Gummer, S.L., 1991, January. Duration of bat colonies in Indiana. In Proceedings of the Indiana Academy of Science (Vol. 99, No. 2-4, pp. 199-202).	Summer	1959	0	0	30	1	Jackson County	Indiana			hibernacula in barn - eventually sprayed with grease to get rid of bats
1992	a29	Whitaker Jr, J.O. and Rissler, L.J., 1992, January. Seasonal activity of bats at Copperhead Cave. In Proceedings of the Indiana Academy of Science (Vol. 101, No. 1-2, pp. 127-134).	Winter	Sept 1989 - May 1991	202	295	497	1	Vermillion County	Indiana			Harp nets outside of mine entrance, trapped monthly. Males present in summer and winter, females present late July through April.
1996	a30	Winchell, J.M. and Kunz, T.H., 1996. Day-roosting activity budgets of the eastern pipistrelle bat, Pipistrellus subflavus (Chiroptera: Vespertilionidae). Canadian Journal of Zoology, 74(3), pp.431-441.	Summer	May 10 - July 25 1979	9	0	9	1	Worcester County	Massachuessets			Only females studied
1998	a31	Hoying, K.M. and Kunz, T.H., 1998. Variation in size at birth and post-natal growth in the insectivorous bat Pipistrellus subflavus (Chiroptera: Vespertilionidae). Journal of Zoology, 245(1), pp.15-27.	Summer	May - August 1981-1982	14,15	23,14	66	1	Worcester County,	Massachuessets			Predation by house cats (Felis catus) and raccoons (Procyon lotor) reported
1999	a32	Menzel, M.A., Krishon, D.M., Carter, T.C. and Laerm, J., 1999. Notes on tree roost characteristics of the northern yellow bat (Lasiurus intermedius), the Seminole bat (L. seminolus), the evening bat (Nycticeius humeralis), and the eastern pipistrelle (Pipistrellus subflavus). Florida Scientist, pp.185-193.	Summer	June 19 - July 14 1995			1	1	McIntosh County	Georgia			roost in trees
2000	a33	Hilton, C.D. and Best, T.L., 2000. Gastrointestinal helminth parasites of bats in Alabama. Occasional Papers of the North Carolina Museum of Natural Sciences and the North Carolina Biological Survey, 12, pp.57-66.	Winter and Summer	Feb - Nov 1990	12	33	45	27	Lee County	Alabama			hibernacula in building
2001	a34	Broders, H.G., McAlpine, D.F. and Forbes, G.J., 2001. Status of the eastern pipistrelle (Pipistrellus subflavus)(Chiroptera: Vespertilionidae) in New Brunswick. Northeastern Naturalist, pp.331-336.	Summer				5	1	Albert County	New Brunswick			isoalted calls using anabat.
2001	a35	Lance, Richard F., et al. “Day-Roost Selection by Rafinesque’s Big-Eared Bats (Corynorhinus Rafinesquii) in Louisiana Forests.” Journal of Mammalogy, vol. 82, no. 1, 2001, pp. 166–72. JSTOR, http://www.jstor.org/stable/1383689.	summer	1996-1998					Kistachie Parish, Winn Parish, Vernon Parish, Rapides Parish	Louisiana			study roosts under bridges, no sex ratio
2001	a36	Sandel, J.K., Benatar, G.R., Burke, K.M., Walker, C.W., Lacher, T.E. and Honeycutt, R.L., 2001. Use and selection of winter hibernacula by the eastern pipistrelle (Pipistrellus subflavus) in Texas. Journal of Mammalogy, 82(1), pp.173-178.	Summer	1995, 1996, 1997	249, 95	104, 68	353, 163	4	Leon County	Texas			For all bats captured, ratio of males to females was 2.4:1 (n = 353) and 1.4:1 (n = 163) for 1995–1996 and 1996–1997, respectively.
2002	a37	Ammerman, L.K., Rodriguez, R.M., Higginbotham, J.L. and Matthews, A.K., 2002. Recent records of bats from the lower canyons of the Rio Grande River of West Texas. The Texas journal of science, 54(4), pp.369-375.	Fall	Oct 30-Nov 4 1999; March 19-22 2001; Oct 7-12 2001	0	0		8	Brewster County and Terrel County	Texas			no tricolored bats captured during study period
2002	a38	Menzel Jr, M.A., Menzel, J.M., Carter, T.C., Whitaker Jr, J.O. and Ford, W.M., 2002. Notes on the late summer diet of male and female eastern pipistrelles (Pipistrellus subflavus) at Fort Mountain State Park, Georgia. Georgia Journal of Science, 60(3), pp.170-180.	Summer	1998-08-21	24	101	125	1	Murray County	Georgia			Fort Mountain State Park -female main diet: Homoptera and Coleoptera; male main diet: Homoptera and Diptera
2002	a39	Trousdale, A.W. and Beckett, D.C., 2002. Bats (Mammalia: Chiroptera) recorded from mist-net and bridge surveys in southern Mississippi. Officers of the Mississippi Academy of Sciences, 47(4), p.185.	Summer	June-July 1999-2000	3	1	4	13	Forrest County, Lamar County, Stone County, Wayne County, Jackson County, Adams County, Wilkinson County, Jones County, Pearl River County	Mississippi			additional female included in count - not captured but observed nursing under a bridge in Homochitto NF
2003	a40	Briggler, J.T. and Prather, J.W., 2003. Seasonal use and selection of caves by the eastern pipistrelle bat (Pipistrellus subflavus). The American midland naturalist, 149(2), pp.406-412.	Winter	1998-2000	0	0	592	93	Crawford County	Arkansas
2003	a41	Broders, H.G., Quinn, G.M. and Forbes, G.J., 2003. Species status, and the spatial and temporal patterns of activity of bats in southwest Nova Scotia, Canada. Northeastern Naturalist, 10(4), pp.383-398.	Summer	May-September 2001	3	0	3	16	Digby County and Annapolis County	Nova Scotia, Canada	44.399167, 44.2544294	-65.218333, -66.3682814	12 sites echolocation and 4 harp trap sites - no tricolored bat hibernacula reported
2003	a42	Carter, T. C., Menzel, M. A., Owen, S. F., Edwards, J. W., Menzel, J. M., & Ford, W. M. (2003). Food habits of seven species of bats in the Allegheny Plateau and Ridge and Valley of West Virginia. Northeastern Naturalist, 10(1), 83-88.	summer (june - august)	1998	UNK	UNK	27	2	Randolph, Pendleton, Grant County	West Virginia			** did not include sex ratio of tricolored bats in article** captured bats using mist netting; highly diverse diet consuming an even propotion of six orders of insects including Coleptera, Hemiptera, Lepidoptera, Homoptera, Diptera, Hymenoptera, Tricoptera. - Neuroptera was not consumed regularly
2003	a43	Miller, D.A., 2003. Species diversity, reproduction, and sex ratios of bats in managed pine forest landscapes of Mississippi. Southeastern Naturalist, 2(1), pp.59-72.	Summer	late april to early sept 1998-2000	13	12	25	12	Choctaw County, Kemper County, Lowndes County, Monroe County, and Webster County	Mississippi			mist netted to capture bats - no hibernacula reported
2003	a44	Veilleux, J.P., Whitaker, J.O. and Veilleux, S.L., 2003. Tree-roosting ecology of reproductive female eastern pipistrelles, Pipistrellus subflavus, in Indiana. Journal of Mammalogy, 84(3), pp.1068-1075.	Summer	1998-2000	19	0	19	1	Vigo County	Indiana			Radiotracked females to 66 colonies in tree canopies
2004	a45	Benedict, R.A., 2004. Reproductive activity and distribution of bats in Nebraska. Western North American Naturalist, pp.231-248.	Summer	1990-2002	7	5	18		Cherry County, Dixon county, Greeley county	Nebraska			Sporadic finds over 12 years
2004	a46	Geluso, K.N., Benedict, R.A. and Kock, F.L., 2004. Seasonal activity and reproduction in bats of east-central Nebraska.	Summer	1988, 1989 may sept	1	1	2	1	Sarpy County	Nebraska			summer finds
2004	a47	Veilleux, J.P. and Veilleux, S.L., 2004. Intra-annual and interannual fidelity to summer roost areas by female eastern pipistrelles, Pipistrellus subflavus. The American Midland Naturalist, 152(1), pp.196-200.	Summer	May - August 1999-2000	4	0	4	1	Vigo County	Indiana			mist netting
2005	a48	Ammerman, L.K., 2005. Noteworthy records of the eastern pipistrelle, Perimyotis subflavus, and silver-haired bat, Lasionycteris noctivagans,(Chiroptera: Vespertilionidae) from the Chisos Mountains, Texas. The Texas Journal of Science, 57(2), pp.202-208.	Summer	May 22, 2004; May 23, 1999; July 29, 2002	0	1	1	1	Brewster County	Texas			1 adult male captured in mist net - first tricolored documented in county
2005	a49	Ferrara, F.J. and Leberg, P.L., 2005. Influence of investigator disturbance and temporal variation on surveys of bats roosting under bridges. Wildlife Society Bulletin, 33(3), pp.1113-1122.	Winter and Summer	2002-2003			29	unk	Winn Parrish, Natchitoches Parrish, Grant Parrish	Louisiana			902 surveys of concrete T structure bridges conducted. Number of bridges unknown.
2005	a50	Geluso, K., Mollhagen, T.R., Tigner, J.M. and Bogan, M.A., 2005. Westward expansion of the eastern pipistrelle (Pipistrellus subflavus) in the United States, including new records from New Mexico, South Dakota, and Texas. Western North American Naturalist, 65(3), pp.405-409.	Summer and Winter	Sept 30, 2003; Jan 7, 2003; Jan 12, 2004; April 14, 2004	0	2	6	6	Union County (NM), Pennington County (SD), Presidio County (TX)	New Mexico, South Dakota, Texas			2 adult male tricolored bats captured, other bats observed from a distance and were not sexed
2006	a51	White, J.A., Moosman Jr, P.R., Kilgore, C.H. and Best, T.L., 2006. First record of the eastern pipistrelle (Pipistrellus subflavus) from southern New Mexico. The Southwestern Naturalist, 51(3), pp.420-422.	Summer	2004	0	1	1	5	Eddy County	New Mexico
2007	a52	Kalcounis-Rueppell, M.C., Payne, V.H., Huff, S.R. and Boyko, A.L., 2007. Effects of wastewater treatment plant effluent on bat foraging ecology in an urban stream system. Biological conservation, 138(1-2), pp.120-130.	Summer	2004, 2005	0	0	0	2	Guilford County	North Carolina			Calls recorded near streams.
2007	a53	Perry, R.W., and R.E. Thill. 2007. Tree roosting by male and female Eastern Pipistrelles in a forested landscape. Journal of Mammalogy 88:974–981.	Summer	2000, 2001, 2002, 2003, 2004, 2005	49	10	59	1	Saline County	Arkansas	34.8001	-92.9669	Males roosted separately from females in summer.
2007	a54	Quinn, G.M. and Broders, H.G., 2007. Roosting and foraging ecology of eastern pipistrelle (Perimyotis subflavus) bats in SW Nova Scotia. Unpublished report to Nova Scotia Habitat Conservation Fund c/o NS Department of Natural Resources.	Summer	2003, 2004	22	1	23	1	Nova Scotia	Canada
2008	a55	Damm, J.P. and Geluso, K., 2008. Use of a mine by eastern pipistrelles (Perimyotis subflavus) in east central Nebraska. Western North American Naturalist, 68(3), pp.382-389.	Summer	june 25 - nov 3 2006	42	38	80	1	Greeley County	Nebraska			39% to 100% male. Lowest in winter months. Some captured by hand in mine
2009	a57	Feldhamer, G.A., Carter, T.C. and Whitaker, J.O., 2009. Prey consumed by eight species of insectivorous bats from southern Illinois. The American Midland Naturalist, 162(1), pp.43-51.	Summer	May-August 1999; May-June 2000			67	41	Saline County	Illinois			Shawnee National Forest; does not differ between male and female; main diet = Trichoptera followed by Coleoptera and Hymenoptera
2009	a58	Valdez, E.W., Geluso, K., Foote, J., Allison-Kosior, G. and Roemer, D.M., 2009. Spring and winter records of the eastern pipistrelle (Perimyotis subflavus) in southeastern New Mexico. Western North American Naturalist, 69(3), pp.396-398.	Summer and Winter	2006; 2008	0	1	3	5	Eddy and Chaves counties	New Mexico			1 adult male captured, 1 tricolored observed and not handled, 1 tricolored found impaled on cholla cactus and could not determine sex
2010	a59	Gilley, L.M. and Kennedy, M.L., 2010. A test of mist-net configurations in capturing bats over stream corridors. Acta Chiropterologica, 12(2), pp.363-369.	Summer	2000 - 2001	0	0	63		Carroll County, Gibson County	Tennessee
2010	a60	Helms, J.S., 2010. A Little Bat and a Big City: Nocturnal Behavior of the Tricolored Bat (Perimyotis subflavus) Near Indianapolis Airport (Doctoral dissertation, Indiana State University).	Summer	2005 - 2007	14	2	16	2	Hendricks County	Indiana			Small study, never published. Roosting and foraging data - no hibernacula recorded
2010	a61	Perry, R.W., Carter, S.A. and Thill, R.E., 2010. Temporal patterns in capture rate and sex ratio of forest bats in Arkansas. The American Midland Naturalist, 164(2), pp.270-282.	Summer	2000-2008	39	13	52		Saline County	Arkansas
2010	a62	Poissant, J.A., Broders, H.G. and Quinn, G.M., 2010. Use of lichen as a roosting substrate by Perimyotis subflavus, the tricolored bat, in Nova Scotia. Ecoscience, 17(4), pp.372-378.	Summer	2003-2004 2007-2008	41	1	42	1	Nova Scotia	Canada			roosting sites in trees - no hibernacula recorded
2010	a63	Prendergast, Jeffrey A., William E. Jensen, and Stanley D. Roth. "Trends in abundance of hibernating bats in a karst region of the southern Great Plains." The Southwestern Naturalist 55.3 (2010): 331-339.	Winter	1964-2005			318	12	Barber County KS, Comanche County KS, Woods County OK	Kansas & Oklahoma			Compiled data from four decades to run regressions.
2010	a64	Yates, M.D. and Muzika, R.M., 2010. Effect of forest structure and fragmentation on site occupancy of bat species in Missouri Ozark forests. The Journal of Wildlife Management, 70(5), pp.1238-1248.	Summer	2003, 2004 May to september	0	0	0	11	Iron County, Madison County, Wayne County	Missouri			Acoustic survey
2011	a65	Farrow, L.J. and Broders, H.G., 2011. Loss of forest cover impacts the distribution of the forest-dwelling tri-colored bat (Perimyotis subflavus). Mammalian Biology, 76(2), pp.172-179.	Summer	2005 - 2006	0	0	100	100	Nova Scotia	Canada
2011	a66	Ford, W.M., Britzke, E.R., Dobony, C.A., Rodrigue, J.L. and Johnson, J.B., 2011. Patterns of acoustical activity of bats prior to and following white-nose syndrome occurrence. Journal of Fish and Wildlife Management, 2(2), pp.125-134.	summer	June-Sep, 2003-2010	0	0	0	2	Jefferson County, Lewis county	New York			audio surveys only
2011	a67	Johnson, J.B., Gates, J.E. and Zegre, N.P., 2011. Monitoring seasonal bat activity on a coastal barrier island in Maryland, USA. Environmental Monitoring and Assessment, 173, pp.685-699.	Summer						Worcester County	Maryland			Acoustic monitoring and models
2011	a68	McAllister, C.T., Burt, S., Seville, R.S. and Robison, H.W., 2011. A new species of Eimeria (Apicomplexa: Eimeriidae) from the eastern pipistrelle, Perimyotis subflavus (Chiroptera: Vespertilionidae), in Arkansas. Journal of Parasitology, 97(5), pp.896-898.	Winter	2009 - 2010	0	0	2	1	Polk Country	Arkansas
2014	a71	~Yates, D.E., Adams, E.M., Angelo, S.E., Evers, D.C., Schmerfeld, J., Moore, M.S., Kunz, T.H., Divoll, T., Edmonds, S.T., Perkins, C. and Taylor, R., 2014. Mercury in bats from the northeastern United States. Ecotoxicology, 23(1), pp.45-55.	Summer	June - August: 2005 - 2009	0	0	0	89	Maine, Maryland, Massachusetts, Virginia, New Hampshire, Pennyslvania, New York, West Virginia	0			captured using mistnets and harp traps - no hibernacula recordeddid not report counties per state
2014	a69	McAllister, C., Seville, R., Arlen, R. and Connior, M., 2014. A new species of Eimeria (Apicomplexa: Eimeriidae) from tri-colored bats, Perimyotis subflavus (Chiroptera: Vespertilionidae), from the Ouachitas of Arkansas. Acta Parasitologica, 59(4), pp.690-693.	winter-summer	February - October 2013			11	3	Marion County, PolkCounty, Searcy County	Arkansas			did not distinguish sexes
2014	a70	Randall, J. and Broders, H.G., 2014. Identification and characterization of swarming sites used by bats in Nova Scotia, Canada. Acta Chiropterologica, 16(1), pp.109-116.	winter		unk	unk	unk	25	Nova Scotia	Canada			Perimyotis subflavus captured in low numbers and not included in analyses
2015	a72	Bunch, M., Loeb, S., Trousdale, A., Clark, M. K., Storm, J., Magniez, J., and Perry, T., 2015. Colonial Cavity Roosting Bats Guild. South Carolina Department of Natural Resources SWAP.	Winter		0	0	2	2	Pickens County, Richland County	South Carolina			White nose mortality
2015	a73	Lacki, M.J., Dodd, L.E., Toomey, R.S., Thomas, S.C., Couch, Z.L. and Nichols, B.S., 2015. Temporal changes in body mass and body condition of cave-hibernating bats during staging and swarming. Journal of fish and wildlife management, 6(2), pp.360-370.	Winter	2011-2014	31	69	593	1	Barren, Hart, and Edmonson	Kentucky
2015	a74	Medina-Fitoria, A., Saldaña, O., Martínez, J.G., Aguirre, Y., Silva, W., Chávez, M., Salazar, M., Carballo, N., Jarquín, O., González, R.A. and Díaz, L., 2015. Nuevos reportes sobre los murciélagos (Mammalia: Chiroptera) de Nicaragua, América Central, con la adición de siete nuevos registros de especies. Mastozoología neotropical, 22(1), pp.43-54.	Winter and Summer	2011-2013						Nicaragua			Year round surveys document seven species of bats previously not-recorded from Nicaragua
2015	a75	Powers, K.E., Reynolds, R.J., Orndorff, W., Ford, W.M. and Hobson, C.S., 2015. Post-White-nose syndrome trends in Virginias cave bats, 2008-2013. Journal of Ecology and the Natural Environment, 7(4), pp.113-123.	Winter	2008-2013	<50%	>50%	349 fall swarm 127 early hibernation, 423 spring hibernation	18	Bath, Bland, Craig, Giles, Highland, Lee, Tazewell, and Wise	Virginia			Email sent to Dr. Powers for more precise data. Reports 14 hibernacula but does not say what structure
2016	a78	~White, J.A., Lemen, C.A. and Freeman, P.W., 2016. Acoustic detection reveals fine-scale distributions of Myotis lucifugus, Myotis septentrionalis, and Perimyotis subflavus in eastern Nebraska. Western North American Naturalist, 76(1), pp.27-35.	Summer	June - August: 2012, 2014	0	0	0	105	Brown Cass Cedar Dixon Gage Jefferson Johnson Keya paha Knox Lancaster Otoe Pawnee Richardson Rock Saline Sarpy Saunders Webster	Nebraska			Acoustic surveys
2016	a76	Cervone, T.H., Yeager, R.K. and King, R.A., 2016. Bats under an Indiana bridge. In Proceedings of the Indiana Academy of Science (Vol. 125, No. 2, pp. 91-102).	Winter	2006-2011	4	2	29	1	Greene County	Indiana			Full year of monitoring data at one bridge, tricolored bats present Nov-May
2016	a77	Silvis, A., Gehrt, S.D. and Williams, R.A., 2016. Effects of shelterwood harvest and prescribed fire in upland Appalachian hardwood forests on bat activity. Forest Ecology and Management, 360, pp.205-212.	Summer	2006, 2009, 2010	unk	unk	1344	12	Jackson, Vinton County	Ohio			Audio surveys only. Activity increases in forests that are periodically thinned/managed for understory growth compared to forests that are unthinned.
2017	a81	Bernard, R.F. and McCracken, G.F., 2017. Winter behavior of bats and the progression of white‐nose syndrome in the southeastern United States. Ecology and evolution, 7(5), pp.1487-1496.	Winter	2012-2014	33 8	49 25			Blount County, Campbell County, Hawkins County, Warren County White County	Tennessee			Bats were more active in WNS infected caves on colder nights than non-infected
2017	a79	McAllister, C.T., Connior, M.B., Bursey, C.R., Durden, L.A., Seville, R.S., Robison, H.W. and Trauth, S.E., 2017, February. Parasites (Coccidia, Trematoda, Acari) of Tri-Colored Bats, Perimyotis subflavus (Chiroptera: Vespertilionidae): New Geographical Records for Oklahoma. In Proceedings of the Oklahoma Academy of Science (Vol. 96).	winter	2015			2	1	Delaware County	Oklahoma			hibernacula in cave; did not sex bats
2017	a80	Pettit, J.L. and O'Keefe, J.M., 2017. Impacts of white-nose syndrome observed during long-term monitoring of a midwestern bat community. Journal of Fish and Wildlife Management, 8(1), pp.69-78.	Summer	2012-2014	0	0	63	2	Hendricks County	Indiana
2018	a82	Adams, R.A., Stoner, B., Nespoli, D. and Bexell, S.M., 2018. New records of tricolored bats (Perimyotis subflavus) in Colorado, with first evidence of reproduction. Western North American Naturalist, 78(2), pp.212-215.	Summer	2017	0	0	5	2	Boulder County, Weld County	Colorado
2018	a83	Weinkauf, C.J., Comer, C.E., Conway, W.C. and Farrell, C., 2018. Dietary composition of four common chiropteran species in a bottomland hardwood forest. Acta chiropterologica, 20(1), pp.195-205.	summer	mid may - august 2013	0	0	10	2	Smith County	Texas			mist netting
2019	a85	~Leivers, S.J., Meierhofer, M.B., Pierce, B.L., Evans, J.W. and Morrison, M.L., 2019. External temperature and distance from nearest entrance influence microclimates of cave and culvert‐roosting tri‐colored bats (Perimyotis subflavus). Ecology and Evolution, 9(24), pp.14042-14052.	Winter	2016 - 2019	0	0	0	0	Pecos Val Verde Freestone Leon Blanco Burnet Comal Edwards Hays Kendall Kerr Menard Real Travis Uvalde Cass Harrison Jasper Montgomery Nacogdoches Panola Rains Rusk Shelby Smith Walker Armstrong Childress Collingsworth Foard King Bexar	Texas
2019	a87	Bernard RF, Evans J, Fuller NW, Reichard JD, Coleman JT, Kocer CJ, Campbell Grant EH (2019) Different management strategies are optimal for combating disease in East Texas cave versus culvert hibernating bat populations. Conservation Science and Practice, 1(10):e106.	Winter										Application of possible treatments and their risks to caves, culverts, and other considertation. No sites or captures to report
2019	a84	Huebschman, J.J., 2019. Bats in southwest Wisconsin during the era of white-nose syndrome. Northeastern Naturalist, 26(1), pp.168-182.bschman 2019,	summer	2004 - 2018	22,5	28,9	64	1	Grant County	Wisconsin			21 June and 10 July lactating females captured. Young of year sex ratio and total sex ratio reported as well - mist netting
2019	a86	Meierhofer, M.B., Johnson, J.S., Leivers, S.J., Pierce, B.L., Evans, J.W. and Morrison, M.L., 2019. Winter habitats of bats in Texas. PLoS One, 14(8), p.e0220839.	Winter	Nov-Mar 2016-2018	unk	unk	784	97	Pecos Val Verde Freestone Leon Blanco Burnet Comal Edwards Hays Kendall Kerr Menard Real Travis Uvalde Cass Harrison Jasper Montgomery Nacogdoches Panola Rains Rusk Shelby Smith Walker Armstrong Childress Collingsworth Foard King Bexar				emailed for county list of where PESU were found. Response list received
2019	a88	O’Keefe, J.M., Pettit, J.L., Loeb, S.C. and Stiver, W.H., 2019. White-nose syndrome dramatically altered the summer bat assemblage in a temperate Southern Appalachian forest. Mammalian Biology, 98, pp.146-153.		2009-2016					Haywood & Swain County, NC Blount, Cocke, Sevier, TN	North Carolina Tennessee
2019	a89	Wine, M., Bowen, C.A. and Green, D.M., 2019. Interspecific aggression between a hoary bat (Lasiurus cinereus) and a tricolored bat (Perimyotis subflavus) in Northern Arkansas. Southeastern naturalist, 18(4), p.N37.	Summer	2017	0	0	1	1	Marrion County	Arkansas			Inter-species aggression
2020	a90	Perry, R.w., and P.N. Jordan. 2020. Survival and persistence of tricolored bats hibernating in Arkansas mines.	Winter	Nov, Dec, Feb, Mar: 2014-2019	133	227	360	4	Garland County	Arkansas			at one site, males=female ratio, the other three were drastically different.
2020	a91	Turcios-Casco, M.A., Mejía-Suazo, C.J., Bautista, D.J.O. and Ávila-Palma, H.D., 2020. Noteworthy records of the Geoffroy’s tailless bat and the East-ern Pipistrelle in Copán, western Honduras (Mammalia Chi-roptera). Biodiversity Journal, 2020,11 (2): 527–534	Winter	Oct Nov 2017	0	2	2	1		Honduras			Cuaght in cave via mistnets
2021	a93	Bernard, R.F., Willcox, E.V., Jackson, R.T., Brown, V.A. and McCracken, G.F., 2021. Feasting, not fasting: winter diets of cave hibernating bats in the United States. Frontiers in Zoology, 18, pp.1-13.	Winter					6	Blount County, Campbell County, Hawkins County, Warren County White County	Tennessee			Fecal sampling of bats at winter hibernacula. Captures of flying bats
2021	a92	Deeley, S., Johnson, J.B., Ford, W.M. and Gates, J.E., 2021. White-nose syndrome-related changes to Mid-Atlantic bat communities across an urban-to-rural gradient. BMC Zoology, 6(1), p.12.	Summer	2003, 2004; 2016 - 2018			34	74	MD: Allegany, Washington, Frederick, Montgomery, Prince George's, Charles; District of Columbia (Washington DC); VA: Gloucester, York, Matthews, Westmoreland, King George, Stafford, Prince William, Arlington, Fairfax, Loudon, Caroline, Hanover, Lancaster, Northumberland, Middlesex; WV: Jefferson, Berkeley, Morgan, Hampshire, Mineral	Maryland, WashingtonDC, Virginia, West Virginia
2021	a94	Hanttula, M.K. and Valdez, E.W., 2021. First record and diet of the tri-colored bat (Perimyotis subflavus) from Guadalupe Mountains National Park and Culberson County, Texas. Western North American Naturalist, 81(1), pp.131-134.	Summer	2019	1	0	1	1	Culberson County	Texas			first documentation of P. subflavus in western TX and Guadalupe Mountains National Park (non-reproductive female); diet = Lepidoptera, Hymenoptera, Coleoptera
2021	a95	Johnson, C., Brown, D.J., Sanders, C. and Stihler, C.W., 2021. Long‐term changes in occurrence, relative abundance, and reproductive fitness of bat species in relation to arrival of White‐nose Syndrome in West Virginia, USA. Ecology and Evolution, 11(18), pp.12453-12467.	Summer	2003 - 2019	UNK	UNK	502	290	Grant County, Tucker County, Randolph County, Greenbrier County, Webster County, Preston County, Nicholas County, Pendleton County, Pocahontas County	West Virginia			** did not include sex ratio of tricolored bats in paper** Hellhole Cave in Pendleton County is the largest hibernaculum known in WV
2021	a96	Leivers, S.J., Lee, E.H. and Fuller, N.W., 2021. Tri-Colored Bat (Perimyotis subflavus) Predation by a Dark Fishing Spider (Dolomedes tenebrosus) in East Texas. Southeastern Naturalist, 20(3), p.N98.	Winter							Texas			Isolated observation from above study. Not included in Figure.
2021	a97	Newman, B.A., Loeb, S.C. and Jachowski, D.S., 2021. Winter roosting ecology of tricolored bats (Perimyotis subflavus) in trees and bridges. Journal of Mammalogy, 102(5), pp.1331-1341.	Winter	November - March 2017-2019	4	11	15	1	Aiken County	South Carolina			The most frequently used tree species were sweetgum (Liquidambar styraciflua; n = 7) and oaks (Quercus spp.; n = 6), including two roosts in swamp chestnut oaks, Q. michauxii. Bats also used tupelo (Nyssa spp.; n = 3), yellow poplar (also known as tulip tree; Liriodendron tulipifera; n = 3), sweetbay (Magnolia virginiana; n = 2), loblolly pine (Pi. taeda; n = 1), red maple (Acer rubrum; n = 1), a…
2021	a98	Shute KE, Loeb SC, Jachowski DS (2021) Summer Roosting Ecology of the Northern Yellow Bat and Tri-Colored Bat in Coastal South Carolina. Southeastern Naturalist 20	Summer	2018 - 2019	4	3	7	3	Beaufort County	South Carolina			Tri-colored Bats spent 1.3 ± 0.5 days (min–max = 1–3) in a roost and average distance between subsequent roosts was 107 ± 84 m (min–max = 6–294 m). All roost trees were live, and species used were Liquidambar styraciflua L. (Sweetgum; n = 7), Quercus virginiana Miller (Southern Live Oak; n = 7), Celtis laevigata Willdenow (Sugar Hackberry; n = 3), Q. laurifolia Michaux (Laurel Oak; n = 2), Q. nig…
2021	a99	Smith, L.M., Doonan, T.J., Sylvia, A.L. and Gore, J.A., 2021. Characteristics of caves used by wintering bats in a subtropical environment. Journal of Fish and Wildlife Management, 12(1), pp.139-150.	Winter	2015-2017			2752	162	Alachua County, Citrus County, Gilcrest County, Jackson County, Levy County, Marrion County, Sumter County, Washington County	Florida			No tricolored bats found in Gilcrest County or Sumter County
2022	a100	Andersen, B.R., McGuire, L.P., Wigley, T.B., Miller, D.A. and Stevens, R.D., 2022. Habitat associations of overwintering bats in managed pine forest landscapes. Forests, 13(5), p.803.	Winter					27	Bienville Parish Jackson Parish Winn Parish Newton County TX	Louisiana & Texas
2022	a101	Hammesfahr, A., Rega-Brodsky, C.C., Womack-Bulliner, K. and Whitney, J., 2022. Roost characteristics of a tricolored bat Perimyotis subflavus in the Missouri Ozarks. Transactions of the Kansas Academy of Science, 125(3-4), pp.159-164.	summer	May-August 2018 and 2019	1	1	2	2	Shannon, Carter, Reynolds counties	Missouri			non-reproductive female switched between 2 roost trees (oak spp) after four days: leaf cluster in snag and exfoliating bark of live tree (1.5 km from roost to roost)
2022	a102	Jackson, R.T., Willcox, E.V. and Bernard, R.F., 2022. Winter torpor expression varies in four bat species with differential susceptibility to white-nose syndrome. Scientific Reports, 12(1), p.5688.	Winter	2016-2019					Blount County Hawkins County White County	Tennessee
2022	a103	Jackson, R.T., Willcox, E.V., Zobel, J.M. and Bernard, R.F., 2022. Emergence activity at hibernacula differs among four bat species affected by white‐nose syndrome. Ecology and Evolution, 12(7), p.e9113.	winter	2016-2019	8 15 1	39 99 6	168		Blount County Hawkins County White County	Tennessee			Bats were pit tagged in three different years, the numbers are cumulative of those three years, AND each year had male skewed populaitons.
2022	a104	Perea S, Yearout JA, Ferrall EA, Morris KM, Pynne JT, Castleberry SB (2022) Seven-year impact of white-nose syndrome on tri-colored bat (Perimyotis subflavus) populations in Georgia, USA. Endang Species Res 48:99-106. https://doi.org/10.3354/esr01189\	Summer	2011-2020				45	Walker, Chattooga, Floyd, Bartow, Cherokee, Murray, Gilmer, Fannin, Union, Lumpkin, White, Towns, Rabun, Habersham, Stephens, Oconee, Morgan, Greene, Putnam, Columbia, Meriwether, Harris, Talbot, Taylor, Marion, Schley, Webster, Randolph, Calhoun, Jones, Bibb, Twiggs, Bleckley, Pulaski, Wheeler, Laurens, Washington, Burke, Jenkins, Emanuel, Bulloch, Turner, Toombs, Tattinall, Effingham, Chatham, …	Georgia			Acoustics, no sex ratio
2022	a105	Perry, R.W. and Jordan, P.N., 2022. Changes in the Forest Bat Community After Arrival of White-Nose Syndrome in the Ouachita Mountains of Arkansas. Southeastern Naturalist, 21(2), pp.107-115.	Summer	2020-2021				5	Saline County	Arkansas			Continuation of Perry 2010
2022	a106	Smith, L.M., Gore, J.A., Doonan, T.J. and Campbell, C.J., 2022. Tricolored bats at a southern range edge exhibit partial migration northward in autumn. Movement Ecology, 10(1), p.56.	Winter	2018			111	40	Alachua County, Citrus County, Gadson County, Jackson County, Levy County, Marrion County, Putnam County, Washington County	Florida			Fur samples taken for migration estimates
2022	a107	Turner, G.G., Sewall, B.J., Scafini, M.R., Lilley, T.M., Bitz, D. and Johnson, J.S., 2022. Cooling of bat hibernacula to mitigate white‐nose syndrome. Conservation Biology, 36(2), p.e13803.	Winter	1990-2018					Lackawanna Luzerne Lycoming Centre Miffin Huntington Blair Clearfield Somerset Fayette Westmoreland Armstrong Lawrence Beaver	Pennsylvania
	0

## Sheet: Counties&GIS
FIDs	County	State	Lat	long		IDs						IDs	FIDs
a1	Tompkins	New York	42.4519	-76.4737		1						1	a1
a2	Fillmore	Minnesota	43.6741	-92.0902		2						2	a2
a2	Goodhue	Minnesota	44.4098	-92.7228		2						3	a3
a2	Nicollet	Minnesota	44.35	-94.2472		2						4	a4
a2	Scott	Minnesota	44.6486	-93.5358		2						5	a5
a2	Wabasha	Minnesota	44.2843	-92.2302		2						6	a6
a2	Washington	Minnesota	45.038	-92.884		2						8	a8
a3	Berks	Pennsylvannia	40.4164	-75.926		3						9	a9
a4	Franklin	Pennsylvannia	39.9273	-77.7213		4						11	a11
a5	Tompkins	New York	42.4519	-76.4737		5						12	a12
a6	Lancaster	Pennsylvania	40.0423	-76.2477		6						13	a13
a8	Marshall	Kansas	39.7835	-96.523		8						14	a14
a9	Stearns	Minnesota	45.5522	-94.6127		9						15	a15
a11	Monroe	West Virginia	37.5604	-80.5507		11						16	a16
a12	Jackson	Indiana	38.9064	-86.0376		12						17	a17
a13	Dubuque	Iowa	42.4688	-90.8824		13						18	a18
a14	Carter	Kentucky	38.3182	-83.0495		14						19	a19
a15	Monroe	West Virginia	37.5604	-80.5507		15						20	a20
a15	Pendleton	West Virginia	38.6806	-79.351		15						21	a21
a16	Plaquemines	Louisiana	29.4683	-89.6614		16						22	a22
a17	Plaquemines	Louisiana	29.4683	-89.6614		17						23	a23
a18	Black Hawk	Iowa	42.47	-92.3088		18						24	a24
a18	Boone	Iowa	42.0365	-93.9317		18						25	a25
a18	Buena Vista	Iowa	42.7354	-95.1511		18						26	a26
a18	Clayton	Iowa	42.8446	-91.3413		18						28	a28
a18	Clinton	Iowa	41.8981	-90.532		18						29	a29
a18	Dallas	Iowa	41.6848	-94.0397		18						30	a30
a18	Dubuque	Iowa	42.4688	-90.8824		18						31	a31
a18	Grundy	Iowa	42.4018	-92.7915		18						32	a32
a18	Hardin	Iowa	42.3838	-93.2404		18						33	a33
a18	Jackson	Iowa	42.1718	-90.5742		18						35	a35
a18	Mahaska	Iowa	41.3351	-92.6409		18						36	a36
a18	Polk	Iowa	41.6854	-93.5734		18						37	a37
a19	Black Hawk	Iowa	42.47	-92.3088		19						38	a38
a19	Hardin	Iowa	42.3838	-93.2404		19						39	a39
a20	Boone	Iowa	42.0365	-93.9317		20						40	a40
a21	Lawrence	Indiana	38.8411	-86.4834		21						41	a41
a22	Clarke	Alabama	31.6764	-87.8307		22						42	a42
a23	Cass	Nebraska	40.9098	-96.1409		23						43	a43
a23	Sarpy	Nebraska	41.113	-96.112		23						44	a44
a24	Adams	Ohio	38.8456	-83.472		24						45	a45
a25	Boone	Missouri	38.9904	-92.3096		25						46	a46
a26	Allegany	Maryland	39.6216	-78.6991		26						47	a47
a26	Washington	Maryland	39.6037	-77.8139		26						48	a48
a26	Garret	Maryland	39.5511	-79.263		26						49	a49
a28	Jackson	Indiana	38.9064	-86.0376		28						50	a50
a29	Vermillion	Indiana	39.8534	-87.464		29						51	a51
a30	Worcester	Massachuessets	42.351	-71.9075		30						52	a52
a31	Worcester	Massachuessets	42.351	-71.9075		31						53	a53
a32	McIntosh	Georgia	31.501	-81.4143		32						54	a54
a33	Lee	Alabama	32.6012	-85.3554		33						55	a55
a35	Kistachie	Louisiana	38.2729	-77.1575		35						57	a57
a35	Rapides	Louisiana	31.1986	-92.5332		35						58	a58
a35	Vernon	Louisiana	31.1083	-93.1842		35						59	a59
a35	Winn	Louisiana	31.9443	-92.6369		35						60	a60
a36	Leon	Texas	31.2964	-95.9959		36						61	a61
a37	Brewster	Texas	29.8111	-103.252		37						62	a62
a37	Terrell	Texas	30.2247	-102.077		37						63	a63
a38	Murray	Georgia	34.7883	-84.7482		38						64	a64
a39	Adams	Mississippi	31.4831	-91.3533		39						65	a65
a39	Forrest	Mississippi	31.1887	-89.2578		39						66	a66
a39	Jackson	Mississippi	30.5423	-88.6357		39						67	a67
a39	Jones	Mississippi	31.6225	-89.1688		39						68	a68
a39	Lamar	Mississippi	31.2058	-89.5087		39						69	a69
a39	Pearl River	Mississippi	30.7685	-89.5899		39						70	a70
a39	Stone	Mississippi	30.79	-89.1177		39						71	a71
a39	Wayne	Mississippi	31.6407	-88.6958		39						72	a72
a39	Wilkinson	Mississippi	31.161	-91.311		39						73	a73
a40	Crawford	Arkansas	35.5889	-94.2431		40						75	a75
a41	Nova Scotia	Canada	45.151	-63.3707		41						76	a76
a42	Grant	West Virginia	39.1049	-79.1956		42						77	a77
a42	Pendleton	West Virginia	38.6806	-79.351		42						78	a78
a42	Randolph	West Virginia	38.7746	-79.8764		42						79	a79
a43	Choctaw	Mississippi	33.3472	-89.2484		43						80	a80
a43	Kemper	Mississippi	32.7546	-88.6412		43						81	a81
a43	Lowndes	Mississippi	33.4729	-88.4435		43						82	a82
a43	Monroe	Mississippi	33.8922	-88.4805		43						83	a83
a43	Webster	Mississippi	33.6131	-89.2849		43						84	a84
a44	Vigo	Indiana	39.4305	-87.39		44						85	a85
a45	Cherry	Nebraska	42.5452	-101.118		45						86	a86
a45	Dixon	Nebraska	42.493	-96.8677		45						88	a88
a45	Greeley	Nebraska	41.5674	-98.5212		45						89	a89
a46	Sarpy	Nebraska	41.113	-96.112		46						90	a90
a47	Vigo	Indiana	39.4305	-87.39		47						92	a92
a48	Brewster	Texas	29.8111	-103.252		48						93	a93
a49	Grant	Louisiana	31.5997	-92.5594		49						94	a94
a49	Natchitoches	Louisiana	31.7231	-93.096		49						95	a95
a49	Winn	Louisiana	31.9443	-92.6369		49						97	a97
a50	Pennington	South Dakota	44.005	-102.824		50						98	a98
a50	Presidio	Texas	29.9992	-104.24		50						99	a99
a50	Union	New Mexico	36.4809	-103.47		50						100	a100
a51	Eddy	New Mexico	32.4712	-104.304		51						101	a101
a52	Guilford	North Carolina	36.0794	-79.7891		52						102	a102
a53	Saline	Arkansas	34.6466	-92.6762		53						103	a103
a54	NovaScotia	Canada	45.151	-63.3707		54						104	a104
a55	Greeley	Nebraska	41.5674	-98.5212		55						105	a105
a57	Saline	Illinois	37.7532	-88.5408		57						106	a106
a58	Chaves	New Mexico	33.3625	-104.469		58						107	a107
a58	Eddy	New Mexico	32.4712	-104.304		58						33a	a33a
a59	Carroll	Tennessee	35.9731	-88.4503		59						49a	a49a
a59	Gibson	Tennessee	35.9965	-88.9325		59						50a	a50a
a60	Hendricks	Indiana	39.7694	-86.51		60						58a	a58a
a61	Saline	Arkansas	34.6466	-92.6762		61						69a	a69a
a62	NovaScotia	Canada	45.151	-63.3707		62
a63	Barber	Kansas	37.2288	-98.6848		63
a63	Comanche	Kansas	37.1913	-99.2719		63
a63	Woods	Oklahoma	36.7669	-98.8647		63
a64	Iron	Missouri	37.5035	-90.6844		64
a64	Madison	Missouri	37.478	-90.345		64
a64	Wayne	Missouri	37.1126	-90.4614		64
a65	NovaScotia	Canada	45.151	-63.3707		65
a66	Jefferson	New York	44.0406	-75.9123		66
a66	Lewis	New York	43.7843	-75.4493		66
a67	Worcester	Maryland	38.2199	-75.3569		67
a68	Polk	Arkansas	34.4857	-94.2282		68
a69	Marion	Arkansas	36.2682	-92.6841		69
a69	Polk	Arkansas	34.4857	-94.2282		69
a69	Searcy	Arkansas	35.9109	-92.6995		69
a70	NovaScotia	Canada	45.151	-63.3707		70
a71	Piscataquis	Maine	45.8345	-69.2853		71
a71	Howard	Maryland	39.2508	-76.9313		71
a71	Worcester	Massachusetts	42.351	-71.9075		71
a71	Belknap	New Hampshire	43.5185	-71.423		71
a71	Oneida	New York	43.2415	-75.4359		71
a72	Pickens	South Carolina	34.8874	-82.7254		72
a72	Richland	South Carolina	34.0217	-80.9027		72
a73	Barren	Kentucky	36.9655	-85.9336		73
a73	Edmonson	Kentucky	37.2087	-86.2384		73
a73	Hart	Kentucky	37.2999	-85.8847		73
a75	Bath	Virginia	38.0587	-79.7412		75
a75	Bland	Virginia	37.134	-81.1304		75
a75	Craig	Virginia	37.4812	-80.2125		75
a75	Giles	Virginia	37.3141	-80.7039		75
a75	Highland	Virginia	38.3623	-79.5686		75
a75	Lee	Virginia	36.7056	-83.1288		75
a75	Tazewell	Virginia	37.125	-81.5608		75
a75	Wise	Virginia	36.9753	-82.6213		75
a76	Greene	Indiana	39.0364	-86.962		76
a77	Jackson	Ohio	39.0195	-82.6183		77
a77	Vinton	Ohio	39.251	-82.4853		77
a78	Keya paha	Nebraska				78
a78	Brown	Nebraska				78
a78	Rock	Nebraska				78
a78	Knox	Nebraska				78
a78	Cedar	Nebraska				78
a78	Dixon	Nebraska				78
a78	Sarpy	Nebraska				78
a78	Cass	Nebraska				78
a78	Lancaster	Nebraska				78
a78	Richardson	Nebraska				78
a78	Pawnee	Nebraska				78
a78	Johnson	Nebraska				78
a78	Otoe	Nebraska				78
a78	Gage	Nebraska				78
a78	Jefferson	Nebraska				78
a78	Saline	Nebraska				78
a78	Webster	Nebraska				78
a78	Antelope	Nebraska				78
a78	Saunders	Nebraska				78
a79	Delaware	Oklahoma	36.408	-94.8027		79
a80	Hendricks	Indiana	39.7694	-86.51		80
a81	Blount	Tennessee	35.6872	-83.9255		81
a81	Campbell	Tennessee	36.4035	-84.1494		81
a81	Hawkins	Tennessee	36.4412	-82.945		81
a81	Warren	Tennessee	35.6787	-85.7785		81
a81	White	Tennessee	35.9264	-85.4552		81
a82	Boulder	Colorado	40.0925	-105.358		82
a82	Weld	Colorado	40.5543	-104.394		82
a83	Smith	Texas	32.3749	-95.2691		83
a84	Grant	Wisconsin	42.8672	-90.7062		84
a85	Armstrong	Texas	34.9649	-101.357		85
a85	Blanco	Texas	30.2662	-98.3999		85
a85	Burnet	Texas	30.7882	-98.1825		85
a85	Cass	Texas	33.0775	-94.3437		85
a85	Childress	Texas	34.5291	-100.208		85
a85	Collingsworth	Texas	34.9648	-100.27		85
a85	Comal	Texas	29.8082	-98.2782		85
a85	Edwards	Texas	29.9825	-100.305		85
a85	Foard	Texas	33.9746	-99.7778		85
a85	Freestone	Texas	31.7048	-96.149		85
a85	Harrison	Texas	32.5482	-94.3713		85
a85	Hays	Texas	30.058	-98.031		85
a85	Jasper	Texas	30.7434	-94.025		85
a85	Kendall	Texas	29.9447	-98.7116		85
a85	Kerr	Texas	30.0617	-99.3498		85
a85	Leon	Texas	31.2964	-95.9959		85
a85	Menard	Texas	30.8898	-99.8206		85
a85	Montgomery	Texas	30.3003	-95.5028		85
a85	Nacogdoches	Texas	31.616	-94.6156		85
a85	Panola	Texas	32.1624	-94.3057		85
a85	Pecos	Texas	30.7812	-102.723		85
a85	Rains	Texas	32.8703	-95.7934		85
a85	Real	Texas	29.8317	-99.8221		85
a85	Rusk	Texas	32.1076	-94.7618		85
a85	Shelby	Texas	31.7924	-94.1449		85
a85	Smith	Texas	32.3749	-95.2691		85
a85	Travis	Texas	30.3346	-97.7818		85
a85	Uvalde	Texas	29.3573	-99.7622		85
a85	Val Verde	Texas	29.8928	-101.151		85
a85	Walker	Texas	30.739	-95.5722		85
a86	Armstrong	Texas	34.9649	-101.357		86
a86	Blanco	Texas	30.2662	-98.3999		86
a86	Burnet	Texas	30.7882	-98.1825		86
a86	Cass	Texas	33.0775	-94.3437		86
a86	Childress	Texas	34.5291	-100.208		86
a86	Collingsworth	Texas	34.9648	-100.27		86
a86	Comal	Texas	29.8082	-98.2782		86
a86	Edwards	Texas	29.9825	-100.305		86
a86	Foard	Texas	33.9746	-99.7778		86
a86	Freestone	Texas	31.7048	-96.149		86
a86	Harrison	Texas	32.5482	-94.3713		86
a86	Hays	Texas	30.058	-98.031		86
a86	Jasper	Texas	30.7434	-94.025		86
a86	Kendall	Texas	29.9447	-98.7116		86
a86	Kerr	Texas	30.0617	-99.3498		86
a86	Leon	Texas	31.2964	-95.9959		86
a86	Menard	Texas	30.8898	-99.8206		86
a86	Montgomery	Texas	30.3003	-95.5028		86
a86	Nacogdoches	Texas	31.616	-94.6156		86
a86	Panola	Texas	32.1624	-94.3057		86
a86	Pecos	Texas	30.7812	-102.723		86
a86	Rains	Texas	32.8703	-95.7934		86
a86	Real	Texas	29.8317	-99.8221		86
a86	Rusk	Texas	32.1076	-94.7618		86
a86	Shelby	Texas	31.7924	-94.1449		86
a86	Smith	Texas	32.3749	-95.2691		86
a86	Travis	Texas	30.3346	-97.7818		86
a86	Uvalde	Texas	29.3573	-99.7622		86
a86	Val Verde	Texas	29.8928	-101.151		86
a86	Walker	Texas	30.739	-95.5722		86
a88	Blount	Tennessee	35.6872	-83.9255		88
a88	Cocke	Tennessee	35.9254	-83.1212		88
a88	Haywood	North Carolina	35.5559	-82.9821		88
a88	Sevier	Tennessee	35.7846	-83.5241		88
a88	Swain	North Carolina	35.4868	-83.4929		88
a89	Marion	Arkansas	36.2682	-92.6841		89
a90	Garland	Arkansas	34.5767	-93.1504		90
a92	District of Columbia	District of Columbia	38.9099	-77.0147		92
a92	Allegany	Maryland	39.6216	-78.6991		92
a92	Arlington	Virginia	38.8786	-77.101		92
a92	Berkeley	West Virginia	43.5185	-71.423		92
a92	Caroline	Virginia	38.027	-77.3475		92
a92	Charles	Maryland	38.5073	-76.9903		92
a92	Fairfax	Virginia	38.8385	-77.2788		92
a92	Frederick	Maryland	39.4722	-77.398		92
a92	Gloucester	Virginia	37.4235	-76.5428		92
a92	Hampshire	West Virginia	34.631	-83.5311		92
a92	Hanover	Virginia	37.7602	-77.4906		92
a92	Jefferson	West Virginia	30.7434	-94.025		92
a92	King George	Virginia	38.2729	-77.1575		92
a92	Lancaster	Virginia	37.7365	-76.4633		92
a92	Loudoun	Virginia	39.0906	-77.6357		92
a92	Mathews	Virginia	37.4367	-76.3447		92
a92	Middlesex	Virginia	37.6335	-76.5746		92
a92	Mineral	West Virginia	40.6103	-77.6176		92
a92	Montgomery	Maryland	39.1363	-77.2042		92
a92	Morgan	West Virginia	30.3003	-95.5028		92
a92	Northumberland	Virginia	37.8894	-76.4249		92
a92	Prince George's	Maryland	38.832	-76.8445		92
a92	Prince William	Virginia	38.7038	-77.482		92
a92	Stafford	Virginia	38.4212	-77.4604		92
a92	Washington	Maryland	39.6037	-77.8139		92
a92	Westmoreland	Virginia	38.1109	-76.8053		92
a92	York	Virginia	37.2374	-76.5643		92
a93	Blount	Tennessee	35.6872	-83.9255		93
a93	Campbell	Tennessee	36.4035	-84.1494		93
a93	Hawkins	Tennessee	36.4412	-82.945		93
a93	Warren	Tennessee	35.6787	-85.7785		93
a93	White	Tennessee	35.9264	-85.4552		93
a94	Culberson	Texas	31.4463	-104.518		94
a95	Grant	West Virginia	39.1049	-79.1956		95
a95	Greenbrier	West Virginia	37.9469	-80.453		95
a95	Nicholas	West Virginia	38.2916	-80.7994		95
a95	Pendleton	West Virginia	38.6806	-79.351		95
a95	Pocahontas	West Virginia	38.3316	-80.0084		95
a95	Preston	West Virginia	39.4691	-79.6683		95
a95	Randolph	West Virginia	38.7746	-79.8764		95
a95	Tucker	West Virginia	39.1136	-79.5649		95
a95	Webster	West Virginia	38.4946	-80.422		95
a97	Aiken	South Carolina	33.5442	-81.6352		97
a98	Beaufort	South Carolina	32.3858	-80.738		98
a99	Alachua	Florida	29.6748	-82.3576		99
a99	Citrus	Florida	28.8504	-82.4696		99
a99	Gilchrist	Florida	29.7259	-82.8004		99
a99	Jackson	Florida	30.7955	-85.2154		99
a99	Levy	Florida	29.3215	-82.7389		99
a99	Marion	Florida	29.2103	-82.0568		99
a99	Sumter	Florida	28.7045	-82.081		99
a99	Washington	Florida	30.6106	-85.6655		99
a100	Bienville	Louisiana	32.3472	-93.0559		100
a100	Jackson	Louisiana	32.302	-92.5578		100
a100	Newton	Texas	30.7857	-93.745		100
a100	Winn	Louisiana	31.9443	-92.6369		100
a101	Carter	Missouri	36.9413	-90.9623		101
a101	Reynolds	Missouri	37.3621	-90.9689		101
a101	Shannon	Missouri	37.1572	-91.4006		101
a102	Blount	Tennessee	35.6872	-83.9255		102
a102	Hawkins	Tennessee	36.4412	-82.945		102
a102	White	Tennessee	35.9264	-85.4552		102
a103	Blount	Tennessee	35.6872	-83.9255		103
a103	Hawkins	Tennessee	36.4412	-82.945		103
a103	White	Tennessee	35.9264	-85.4552		103
a104	Bartow	Georgia	34.2378	-84.8406		104
a104	Calhoun	Georgia	31.5292	-84.6246		104
a104	Chattooga	Georgia	34.475	-85.3453		104
a104	Cherokee	Georgia	34.2439	-84.4764		104
a104	Columbia	Georgia	33.5442	-82.2641		104
a104	Fannin	Georgia	34.8641	-84.3196		104
a104	Floyd	Georgia	34.2631	-85.2144		104
a104	Gilmer	Georgia	34.6912	-84.4556		104
a104	Greene	Georgia	33.5788	-83.1667		104
a104	Habersham	Georgia	34.631	-83.5311		104
a104	Harris	Georgia	32.7361	-84.9088		104
a104	Jones	Georgia	33.0251	-83.5605		104
a104	Lumpkin	Georgia	34.5721	-84.003		104
a104	Marion	Georgia	32.3533	-84.5246		104
a104	Meriwether	Georgia	33.0406	-84.6883		104
a104	Morgan	Georgia	33.5908	-83.4924		104
a104	Murray	Georgia	34.7883	-84.7482		104
a104	Oconee	Georgia	33.8349	-83.437		104
a104	Putnam	Georgia	33.3218	-83.3729		104
a104	Rabun	Georgia	34.8818	-83.4022		104
a104	Randolph	Georgia	31.7626	-84.7542		104
a104	Schley	Georgia	32.2617	-84.3147		104
a104	Stephens	Georgia	34.5539	-83.2934		104
a104	Talbot	Georgia	32.6995	-84.5331		104
a104	Taylor	Georgia	32.5554	-84.2505		104
a104	Towns	Georgia	34.9167	-83.7372		104
a104	Union	Georgia	34.834	-83.9907		104
a104	Walker	Georgia	34.7356	-85.301		104
a104	Webster	Georgia	32.0466	-84.551		104
a104	White	Georgia	34.6464	-83.7471		104
a105	Saline	Arkansas	34.6466	-92.6762		105
a106	Alachua	Florida	29.6748	-82.3576		106
a106	Citrus	Florida	28.8504	-82.4696		106
a106	Gadsden	Florida	30.5795	-84.6136		106
a106	Jackson	Florida	30.7955	-85.2154		106
a106	Levy	Florida	29.3215	-82.7389		106
a106	Marion	Florida	29.2103	-82.0568		106
a106	Putnam	Florida	29.6086	-81.7442		106
a106	Washington	Florida	30.6106	-85.6655		106
a107	Armstrong	Pennsylvania	40.8123	-79.4646		107
a107	Beaver	Pennsylvania	40.6822	-80.3493		107
a107	Blair	Pennsylvania	40.481	-78.3488		107
a107	Centre	Pennsylvania	40.9194	-77.8199		107
a107	Clearfield	Pennsylvania	41.0001	-78.4745		107
a107	Fayette	Pennsylvania	39.9198	-79.6475		107
a107	Huntingdon	Pennsylvania	40.4166	-77.9814		107
a107	Lackawanna	Pennsylvania	41.4368	-75.6092		107
a107	Lawrence	Pennsylvania	40.9912	-80.3342		107
a107	Luzerne	Pennsylvania	41.177	-75.989		107
a107	Lycoming	Pennsylvania	41.3434	-77.0643		107
a107	Mifflin	Pennsylvania	40.6103	-77.6176		107
a107	Somerset	Pennsylvania	39.9723	-79.0287		107
a107	Westmoreland	Pennsylvania	40.3107	-79.4668		107
a33a	Lee	Alabama	32.6012	-85.3554		33a
a49a	Grant	Louisiana	31.5997	-92.5594		49a
a49a	Natchitoches	Louisiana	31.7231	-93.096		49a
a49a	Winn	Louisiana	31.9443	-92.6369		49a
a50a	Pennington	South Dakota	44.005	-102.824		50a
a50a	Presidio	Texas	29.9992	-104.24		50a
a50a	Union	New Mexico	36.4809	-103.47		50a
a58a	Chaves	New Mexico	33.3625	-104.469		58a
a58a	Eddy	New Mexico	32.4712	-104.304		58a
a69a	Marion	Arkansas	36.2682	-92.6841		69a
a69a	Polk	Arkansas	34.4857	-94.2282		69a
a69a	Searcy	Arkansas	35.9109	-92.6995		69a

## Sheet: SexRatio_Lat
		Citation	Season	Months & years of study	Female	Male	PESU Bat Count Total	Percent Male		Lat
	a54	Quinn, G.M. and Broders, H.G., 2007. Roosting and foraging ecology of eastern pipistrelle (Perimyotis subflavus) bats in SW Nova Scotia. Unpublished report to Nova Scotia Habitat Conservation Fund c/o NS Department of Natural Resources.	Summer	2003, 2004	22	1	23	4.34783	45.151	45.151
	a60	Helms, J.S., 2010. A Little Bat and a Big City: Nocturnal Behavior of the Tricolored Bat (Perimyotis subflavus) Near Indianapolis Airport (Doctoral dissertation, Indiana State University).	Summer	2005 - 2007	14	2	16	12.5	39.7694	39.7694
	a53	Perry, R.W., and R.E. Thill. 2007. Tree roosting by male and female Eastern Pipistrelles in a forested landscape. Journal of Mammalogy 88:974–981.	Summer	2000, 2001, 2002, 2003, 2004, 2005	49	10	59	16.9492	34.6466	34.6466
	a61	Perry, R.W., Carter, S.A. and Thill, R.E., 2010. Temporal patterns in capture rate and sex ratio of forest bats in Arkansas. The American Midland Naturalist, 164(2), pp.270-282.	Summer	2000-2008	39	13	52	25	34.6466	34.6466
	a36	Sandel, J.K., Benatar, G.R., Burke, K.M., Walker, C.W., Lacher, T.E. and Honeycutt, R.L., 2001. Use and selection of winter hibernacula by the eastern pipistrelle (Pipistrellus subflavus) in Texas. Journal of Mammalogy, 82(1), pp.173-178.	Summer	1995, 1996, 1997	249	104	353	29.4618	31.2964	31.2964
	a45	Benedict, R.A., 2004. Reproductive activity and distribution of bats in Nebraska. Western North American Naturalist, pp.231-248.	Summer	1990-2002	7	5	12	41.6667	42.5452	42.5452
	a36	Sandel, J.K., Benatar, G.R., Burke, K.M., Walker, C.W., Lacher, T.E. and Honeycutt, R.L., 2001. Use and selection of winter hibernacula by the eastern pipistrelle (Pipistrellus subflavus) in Texas. Journal of Mammalogy, 82(1), pp.173-178.	Summer	1995, 1996, 1997	95	68	163	41.7178	31.2964	31.2964
	a55	Damm, J.P. and Geluso, K., 2008. Use of a mine by eastern pipistrelles (Perimyotis subflavus) in east central Nebraska. Western North American Naturalist, 68(3), pp.382-389.	Summer	june 25 - nov 3 2006	42	38	80	47.5	41.5674	41.5674
	a43	Miller, D.A., 2003. Species diversity, reproduction, and sex ratios of bats in managed pine forest landscapes of Mississippi. Southeastern Naturalist, 2(1), pp.59-72.	Summer	late april to early sept 1998-2000	13	12	25	48	33.3472	33.3472
	a31	Hoying, K.M. and Kunz, T.H., 1998. Variation in size at birth and post-natal growth in the insectivorous bat Pipistrellus subflavus (Chiroptera: Vespertilionidae). Journal of Zoology, 245(1), pp.15-27.	Summer	May - August 1981-1982	15	14	29	48.2759	42.351	42.351
	a16	Jones, C. and Pagels, J., 1968. Notes on a population of Pipistrellus subflavus in southern Louisiana. Journal of Mammalogy, 49(1), pp.134-139. (summer)	Summer	1965, 1966	30	36	66	54.5455	29.4683	29.4683
	a84	Huebschman, J.J., 2019. Bats in southwest Wisconsin during the era of white-nose syndrome. Northeastern Naturalist, 26(1), pp.168-182.bschman 2019,	summer	2004 - 2018	22	28	50	56	42.8672	42.8672
	a3	Mohr, C.E., 1945, January. Sex ratios of bats in Pennsylvania. In Proceedings of the Pennsylvania Academy of Science (Vol. 19, pp. 65-69). Penn State University (summer) Press.	Summer	June 21 - August 23 1945	22	29	51	56.8627	40.4164	40.4164
	a31	Hoying, K.M. and Kunz, T.H., 1998. Variation in size at birth and post-natal growth in the insectivorous bat Pipistrellus subflavus (Chiroptera: Vespertilionidae). Journal of Zoology, 245(1), pp.15-27.	Summer	May - August 1981-1982	14	23	37	62.1622	42.351	42.351
	a84	Huebschman, J.J., 2019. Bats in southwest Wisconsin during the era of white-nose syndrome. Northeastern Naturalist, 26(1), pp.168-182.bschman 2019,	summer	2004 - 2018	5	9	14	64.2857	42.8672	42.8672
	a38	Menzel Jr, M.A., Menzel, J.M., Carter, T.C., Whitaker Jr, J.O. and Ford, W.M., 2002. Notes on the late summer diet of male and female eastern pipistrelles (Pipistrellus subflavus) at Fort Mountain State Park, Georgia. Georgia Journal of Science, 60(3), pp.170-180.	Summer	1998-08-21	24	101	125	80.8	34.7883	35
	a26	Griffith, L.A. and Gates, J.E., 1985. Food habits of cave-dwelling bats in the central Appalachians. Journal of Mammalogy, 66(3), pp.451-460.	Summer	June-October 1980	1	43	44	97.7273	39.6216	39.6216
	a17	Jones, C. and Pagels, J., 1968. Notes on a population of Pipistrellus subflavus in southern Louisiana. Journal of Mammalogy, 49(1), pp.134-139. (winter)	Winter	1965, 1966	14	5	19	26.3158	29.4683	29.4683
	a17	Jones, C. and Pagels, J., 1968. Notes on a population of Pipistrellus subflavus in southern Louisiana. Journal of Mammalogy, 49(1), pp.134-139. (winter)	Winter	1965, 1966	61	44	105	41.9048	29.4683	29.4683
	a29	Whitaker Jr, J.O. and Rissler, L.J., 1992, January. Seasonal activity of bats at Copperhead Cave. In Proceedings of the Indiana Academy of Science (Vol. 101, No. 1-2, pp. 127-134).	Winter	Sept 1989 - May 1991	202	295	497	59.3561	39.8534	39.8534
	a81	Bernard, R.F. and McCracken, G.F., 2017. Winter behavior of bats and the progression of white‐nose syndrome in the southeastern United States. Ecology and evolution, 7(5), pp.1487-1496.	Winter	2012-2014	33	49	82	59.7561	35.6872	35.6872
	a90	Perry, R.w., and P.N. Jordan. 2020. Survival and persistence of tricolored bats hibernating in Arkansas mines.	Winter	Nov, Dec, Feb, Mar: 2014-2019	133	227	360	63.0556	34.5767	34.5767
	a4	Mohr, C.E., 1945, January. Sex ratios of bats in Pennsylvania. In Proceedings of the Pennsylvania Academy of Science (Vol. 19, pp. 65-69). Penn State University (winter) Press.	Winter	Dec 21 1945 - March 20 1946	43	85	128	66.4062	39.9273	39.9273
	a73	Lacki, M.J., Dodd, L.E., Toomey, R.S., Thomas, S.C., Couch, Z.L. and Nichols, B.S., 2015. Temporal changes in body mass and body condition of cave-hibernating bats during staging and swarming. Journal of fish and wildlife management, 6(2), pp.360-370.	Winter	2011-2014	31	69	100	69	36.9655	36.9655
	a11	Davis, W.H. 1959. Disproportionate Sex Ratios in Hibernating Bats. Journal of Mammalogy , Feb., 1959, Vol. 40, No. 1 (Feb., 1959), pp. 16-19	Winter	Dec 27-28: 1952, 1953, 1954, 1955	118	303	421	71.9715	37.5604	37.5604
	a97	Newman, B.A., Loeb, S.C. and Jachowski, D.S., 2021. Winter roosting ecology of tricolored bats (Perimyotis subflavus) in trees and bridges. Journal of Mammalogy, 102(5), pp.1331-1341.	Winter	November - March 2017-2019	4	11	15	73.3333	33.5442	33.5442
	a15	Davis, W.H., 1966. Population dynamics of the bat Pipistrellus subflavus. Journal of Mammalogy, 47(3), pp.383-396.	Winter	1952-1965	1405	4303	5708	75.3854	37.5604	37.5604
	a81	Bernard, R.F. and McCracken, G.F., 2017. Winter behavior of bats and the progression of white‐nose syndrome in the southeastern United States. Ecology and evolution, 7(5), pp.1487-1496.	Winter	2012-2014	8	25	33	75.7576	35.6872	35.6872
	a4	Mohr, C.E., 1945, January. Sex ratios of bats in Pennsylvania. In Proceedings of the Pennsylvania Academy of Science (Vol. 19, pp. 65-69). Penn State University (winter) Press.	Winter	Dec 21 1945 - March 20 1946	16	50	66	75.7576	39.9273	39.9273
	a8	Jones, J.K., Loomis, R.B., Krutzsch, P.H. and Webb, O.L., 1952. New Records of Bats from Northeastern Kansas, with Notes on the Bat Chigger, Euschongastia pipistrelli (Acarina, Trombiculidae). Transactions of the Kansas Academy of Science (1903-), 55(3), pp.312-314.	Winter	1951	12	40	52	76.9231	39.7835	40
	a11	Davis, W.H. 1959. Disproportionate Sex Ratios in Hibernating Bats. Journal of Mammalogy , Feb., 1959, Vol. 40, No. 1 (Feb., 1959), pp. 16-19	Winter	Dec 27-28: 1952, 1953, 1954, 1955	88	319	407	78.3784	37.5604	37.5604
	a4	Mohr, C.E., 1945, January. Sex ratios of bats in Pennsylvania. In Proceedings of the Pennsylvania Academy of Science (Vol. 19, pp. 65-69). Penn State University (winter) Press.	Winter	Dec 21 1945 - March 20 1946	43	166	209	79.4258	39.9273	39.9273
	a15	Davis, W.H., 1966. Population dynamics of the bat Pipistrellus subflavus. Journal of Mammalogy, 47(3), pp.383-396.	Winter	1952-1965	1044	4383	5427	80.7629	37.5604	37.5604
	a103	Jackson, R.T., Willcox, E.V., Zobel, J.M. and Bernard, R.F., 2022. Emergence activity at hibernacula differs among four bat species affected by white‐nose syndrome. Ecology and Evolution, 12(7), p.e9113.	winter	2016-2019	8	39	47	82.9787	35.6872	35.6872
	a103	Jackson, R.T., Willcox, E.V., Zobel, J.M. and Bernard, R.F., 2022. Emergence activity at hibernacula differs among four bat species affected by white‐nose syndrome. Ecology and Evolution, 12(7), p.e9113.	winter	2016-2019	1	6	7	85.7143	35.6872	35.6872
	a103	Jackson, R.T., Willcox, E.V., Zobel, J.M. and Bernard, R.F., 2022. Emergence activity at hibernacula differs among four bat species affected by white‐nose syndrome. Ecology and Evolution, 12(7), p.e9113.	winter	2016-2019	15	99	114	86.8421	35.6872	35.6872
	a33	Hilton, C.D. and Best, T.L., 2000. Gastrointestinal helminth parasites of bats in Alabama. Occasional Papers of the North Carolina Museum of Natural Sciences and the North Carolina Biological Survey, 12, pp.57-66.	Winter and Summer	Feb - Nov 1990	12	33	45	73.3333	32.6012	32.6012
									39.4305	39.4305
									45.151	45.151
									40.0423	40.0423
